# Supplementary material for: A Brain Model of Disturbed Self-Appraisal in Depression
Source: Atypon-hosted journal article supplement (doi:10.1176/appi.ajp.2017.16080883), 2017-06-09
Supplement: appi.ajp.2017.16080883.ds001.pdf [file appi.ajp.2017.16080883.ds001.pdf]

**TABLE S1.** Activations for the conjunction of rest-fixation, and self-reference greater than rest-fixation.

| Brain region                  | Controls     |                      |                  |     |     | MDD          |                      |                  |     |    |
|-------------------------------|--------------|----------------------|------------------|-----|-----|--------------|----------------------|------------------|-----|----|
|                               | Cluster size | Peak <i>t</i> -value | Peak co-ordinate |     |     | Cluster size | Peak <i>t</i> -value | Peak co-ordinate |     |    |
|                               |              |                      | x                | y   | z   |              |                      | x                | y   | z  |
| Medial prefrontal cortex      | 771          | 8.1                  | 2                | 60  | 10  | 683          | 8.7                  | 0                | 60  | 10 |
| Posterior cingulate cortex    | 164          | 9.1                  | -4               | -50 | 26  | 110          | 7.8                  | -4               | -48 | 28 |
| Left inferior parietal lobule | 226          | 7.3                  | -50              | -66 | 26  | 97           | 6.2                  | -46              | -62 | 28 |
| Left middle temporal gyrus    | 52           | 6.2                  | -58              | -16 | -10 | –            | –                    | –                | –   | –  |

Only clusters of 50 or more voxels are reported.

**TABLE S2.** Effects of sex on parameter estimates for each group and for the groups combined.

| Model parameters | Controls   |               |                 | MDD        |               |                 | Combined   |               |                 |
|------------------|------------|---------------|-----------------|------------|---------------|-----------------|------------|---------------|-----------------|
|                  | Odds ratio | 95% CI        | <i>p</i> -value | Odds ratio | 95% CI        | <i>p</i> -value | Odds ratio | 95% CI        | <i>p</i> -value |
| Fixed            |            |               |                 |            |               |                 |            |               |                 |
| MPFC→PCC         | 0.81       | 0.11 to 5.88  | 0.84            | 3.64       | 0.89 to 14.79 | 0.07            | 2.85       | 0.62 to 12.96 | 0.18            |
| MPFC→IPL         | 1.25       | 0.14 to 11.04 | 0.84            | 4.25       | 0.24 to 76.33 | 0.33            | 2.32       | 0.42 to 12.80 | 0.33            |
| PCC→MPFC         | 0.44       | 0.04 to 4.75  | 0.50            | 0.11       | 0.01 to 1.79  | 0.12            | 0.33       | 0.06 to 1.84  | 0.20            |
| PCC→IPL          | 1.26       | 0.15 to 10.73 | 0.84            | 0.31       | 0.02 to 5.85  | 0.43            | 0.73       | 0.13 to 3.99  | 0.72            |
| IPL→MPFC         | 2.68       | 0.28 to 25.38 | 0.86            | 0.90       | 0.07 to 10.73 | 0.93            | 1.60       | 0.31 to 8.16  | 0.58            |
| IPL→PCC          | 0.45       | 0.11 to 1.95  | 0.29            | 0.56       | 0.10 to 3.19  | 0.52            | 0.47       | 0.16 to 1.42  | 0.18            |
| Modulatory       |            |               |                 |            |               |                 |            |               |                 |
| MPFC→PCC         | 0.86       | 0.52 to 1.45  | 0.58            | 1.30       | 0.79 to 2.13  | 0.30            | 1.00       | 0.72 to 1.40  | 0.98            |
| MPFC→IPL         | 0.80       | 0.31 to 2.08  | 0.65            | 0.41       | 0.11 to 1.46  | 0.17            | 0.62       | 0.29 to 1.32  | 0.22            |
| PCC→MPFC         | 0.80       | 0.46 to 1.37  | 0.42            | 0.59       | 0.19 to 1.83  | 0.36            | 0.70       | 0.43 to 1.14  | 0.15            |
| PCC→IPL          | 1.02       | 0.66 to 1.58  | 0.93            | 1.82       | 0.87 to 3.78  | 0.11            | 1.15       | 0.80 to 1.65  | 0.46            |

MPFC = medial prefrontal cortex; PCC = posterior cingulate cortex; IPL = inferior parietal lobule. An odds ratio > 1 indicates that parameter values are greater in males compared to females, and vice versa.

**TABLE S3.** Associations between age and parameter estimates for each group and for the groups combined.

| Model parameters | Controls       |               |                 | MDD            |               |                 | Combined       |               |                 |
|------------------|----------------|---------------|-----------------|----------------|---------------|-----------------|----------------|---------------|-----------------|
|                  | Correl. coeff. | 95% CI        | <i>p</i> -value | Correl. coeff. | 95% CI        | <i>p</i> -value | Correl. coeff. | 95% CI        | <i>p</i> -value |
| Fixed            |                |               |                 |                |               |                 |                |               |                 |
| MPFC→PCC         | -0.20          | -0.42 to 0.02 | 0.07            | -0.01          | -0.25 to 0.23 | 0.97            | -0.11          | -0.27 to 0.05 | 0.20            |
| MPFC→IPL         | 0.00           | -0.22 to 0.22 | 0.99            | -0.22          | -0.44 to 0.02 | 0.08            | -0.05          | -0.21 to 0.11 | 0.57            |
| PCC→MPFC         | 0.19           | -0.03 to 0.39 | 0.09            | -0.02          | -0.26 to 0.22 | 0.85            | 0.10           | -0.06 to 0.26 | 0.21            |
| PCC→IPL          | 0.06           | -0.16 to 0.27 | 0.57            | 0.18           | -0.06 to 0.40 | 0.16            | 0.09           | -0.07 to 0.25 | 0.28            |
| IPL→MPFC         | 0.02           | -0.20 to 0.24 | 0.86            | 0.07           | -0.17 to 0.30 | 0.60            | 0.03           | -0.13 to 0.19 | 0.71            |
| IPL→PCC          | 0.09           | -0.13 to 0.30 | 0.41            | 0.14           | -0.10 to 0.37 | 0.27            | 0.07           | -0.09 to 0.23 | 0.42            |
| Modulatory       |                |               |                 |                |               |                 |                |               |                 |
| MPFC→PCC         | -0.08          | -0.29 to 0.14 | 0.50            | 0.06           | -0.18 to 0.29 | 0.63            | -0.05          | -0.21 to 0.11 | 0.53            |
| MPFC→IPL         | -0.04          | -0.25 to 0.18 | 0.70            | -0.04          | -0.28 to 0.20 | 0.76            | -0.04          | -0.20 to 0.12 | 0.60            |
| PCC→MPFC         | 0.15           | -0.07 to 0.36 | 0.19            | 0.11           | -0.13 to 0.34 | 0.41            | 0.04           | -0.12 to 0.20 | 0.64            |
| PCC→IPL          | 0.02           | -0.20 to 0.24 | 0.81            | 0.09           | -0.15 to 0.32 | 0.48            | 0.01           | -0.15 to 0.17 | 0.86            |

MPFC = medial prefrontal cortex; PCC = posterior cingulate cortex; IPL = inferior parietal lobule.

**TABLE S4.** Factor loadings of the MADRS items.

| MADRS item                  | Factor 1 | Factor 2 | Factor 3 | Factor 4 |
|-----------------------------|----------|----------|----------|----------|
| Apparent sadness            | 0.86     |          |          |          |
| Reported sadness            | 0.75     |          |          |          |
| Inability to feel           | 0.48     |          |          |          |
| Reduced appetite            |          | 0.69     |          |          |
| Reduced sleep               |          | 0.67     |          |          |
| Pessimistic thoughts        |          | 0.67     |          |          |
| Lassitude                   |          |          | 0.74     |          |
| Suicidal thoughts           |          |          | 0.68     |          |
| Concentration difficulties  |          |          |          | 0.81     |
| Inner tension               |          |          |          | 0.47     |
| <b>% variance explained</b> | 17.9     | 16.4     | 14.5     | 13.1     |

**TABLE S5.** Associations between parameters of interest and clinical and behavioral variables.

|                                                                | <b>Correlation<br/>coefficient</b> | <b>95% CI</b>  | <b><i>p</i>-value</b> | <b><i>q</i>-value</b> |
|----------------------------------------------------------------|------------------------------------|----------------|-----------------------|-----------------------|
| <b>Association with MPFC–PCC<br/>connectivity:</b>             |                                    |                |                       |                       |
| Total MADRS score                                              | 0.03                               | -0.21 to 0.27  | 0.79                  | 0.79                  |
| MADRS sadness factor                                           | -0.08                              | -0.31 to 0.17  | 0.57                  | 0.72                  |
| MADRS somatic/pessimism<br>factor                              | 0.17                               | -0.08 to 0.39  | 0.21                  | 0.61                  |
| MADRS lassitude/suicidality<br>factor                          | 0.10                               | -0.14 to 0.38  | 0.45                  | 0.67                  |
| MADRS concentration/tension<br>factor                          | -0.32                              | -0.51 to -0.08 | 0.01                  | 0.04*                 |
| Proportion of personality<br>adjectives affirmed               | 0.15                               | -0.10 to 0.38  | 0.27                  | 0.61                  |
| Likeableness of personality<br>adjectives affirmed             | -0.06                              | -0.30 to 0.18  | 0.64                  | 0.72                  |
| <b>Association with MADRS<br/>concentration/tension factor</b> |                                    |                |                       |                       |
| Proportion of personality<br>adjectives affirmed               | 0.35                               | 0.10 to 0.54   | 0.008                 | 0.04*                 |
| Likeableness of personality<br>adjectives affirmed             | -0.10                              | -0.34 to 0.14  | 0.45                  | 0.67                  |

*q*-values represent *p*-values that have been adjusted using the false discovery rate.

\*significant at  $q < 0.05$

**TABLE S6.** Comparison of participants who have depression and social anxiety disorder with participants who have depression without an anxiety disorder

|                                                                              | MDD without anxiety disorder |      | MDD with social anxiety disorder |      | <i>p</i> -value |
|------------------------------------------------------------------------------|------------------------------|------|----------------------------------|------|-----------------|
|                                                                              | N                            | %    | N                                | %    |                 |
| Participants                                                                 | 23                           |      | 24                               |      |                 |
| Females                                                                      | 8                            | 34.8 | 16                               | 66.7 | 0.03            |
|                                                                              | Mean                         | S.D. | Mean                             | S.D. |                 |
| Age, <i>y</i>                                                                | 19.3                         | 2.6  | 20.3                             | 2.8  | 0.16            |
| FSIQ                                                                         | 106.7                        | 9.2  | 107.0                            | 6.8  | 0.91            |
| MADRS                                                                        | 34.3                         | 4.8  | 32.0                             | 4.3  | 0.10            |
| Accuracy on external attention task, %                                       | 95.7                         | 4.5  | 94.3                             | 4.6  | 0.27            |
| Mean reaction time for external attention task, <i>s</i>                     | 2.1                          | 0.4  | 2.0                              | 0.4  | 0.44            |
| Mean reaction time for self-appraisal task, <i>s</i>                         | 1.8                          | 0.3  | 1.6                              | 0.3  | 0.08            |
| Proportion of personality adjectives affirmed, %                             | 56.7                         | 10.8 | 55.6                             | 11.4 | 0.99            |
| Likeableness of adjectives affirmed                                          | 3.0                          | 0.3  | 3.1                              | 0.2  | 0.42            |
|                                                                              | Correl. coeff.               | s.e. | Correl. coeff.                   | s.e. |                 |
| Correlation between conc./tension factor and MPFC–PCC connectivity, <i>r</i> | -0.40                        | 0.20 | -0.26                            | 0.21 | 0.62            |

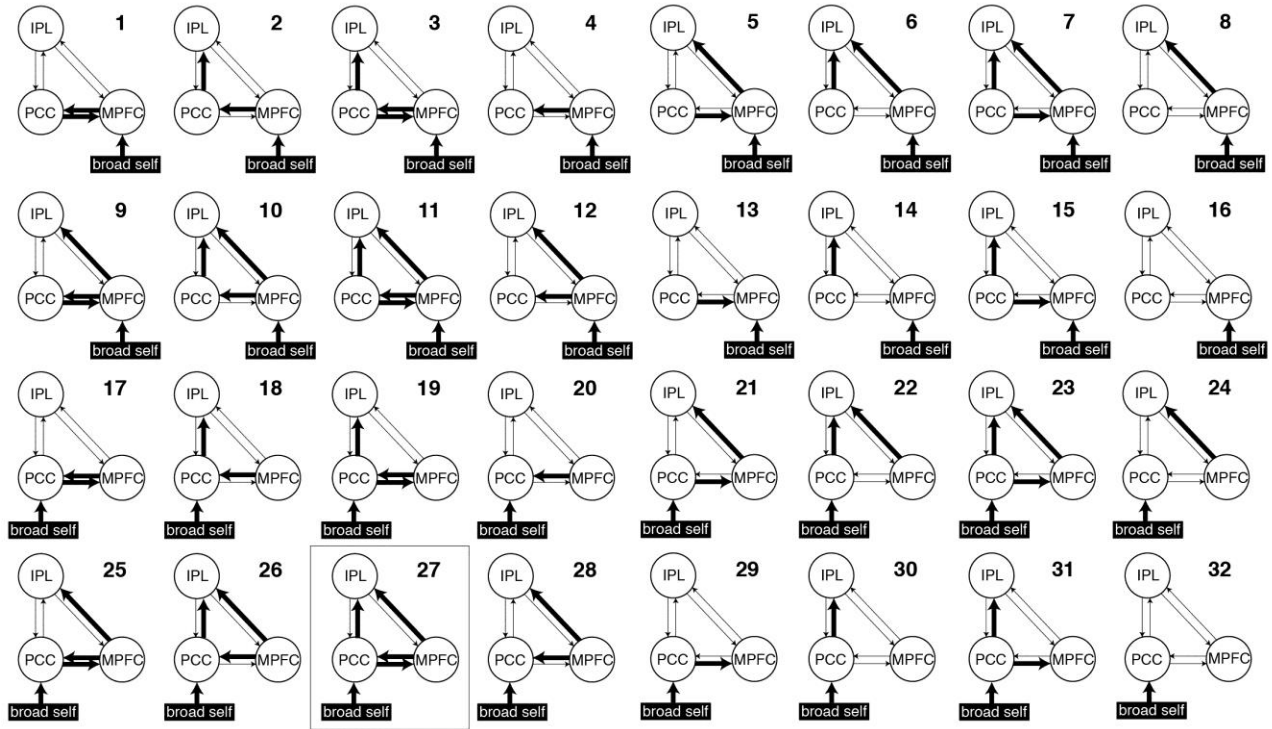

**FIGURE S1.** The DCM candidate model-space. Network connections between the core-self regions were elaborated in 32 models, which varied according to whether broad self (rest-fixation and self-appraisal) drove network activity via MPFC or PCC, and whether self-appraisal modulated efferent connections from MPFC to PCC, IPL, both, or neither, and/or connections from PCC to MPFC, IPL, both, or neither (i.e., a  $2 \times 4 \times 4 = 32$  candidate model-space). Bayesian model selection favored model 27 in both the depressed and control groups. MPFC = medial prefrontal cortex; PCC = posterior cingulate cortex; IPL = inferior parietal lobule.

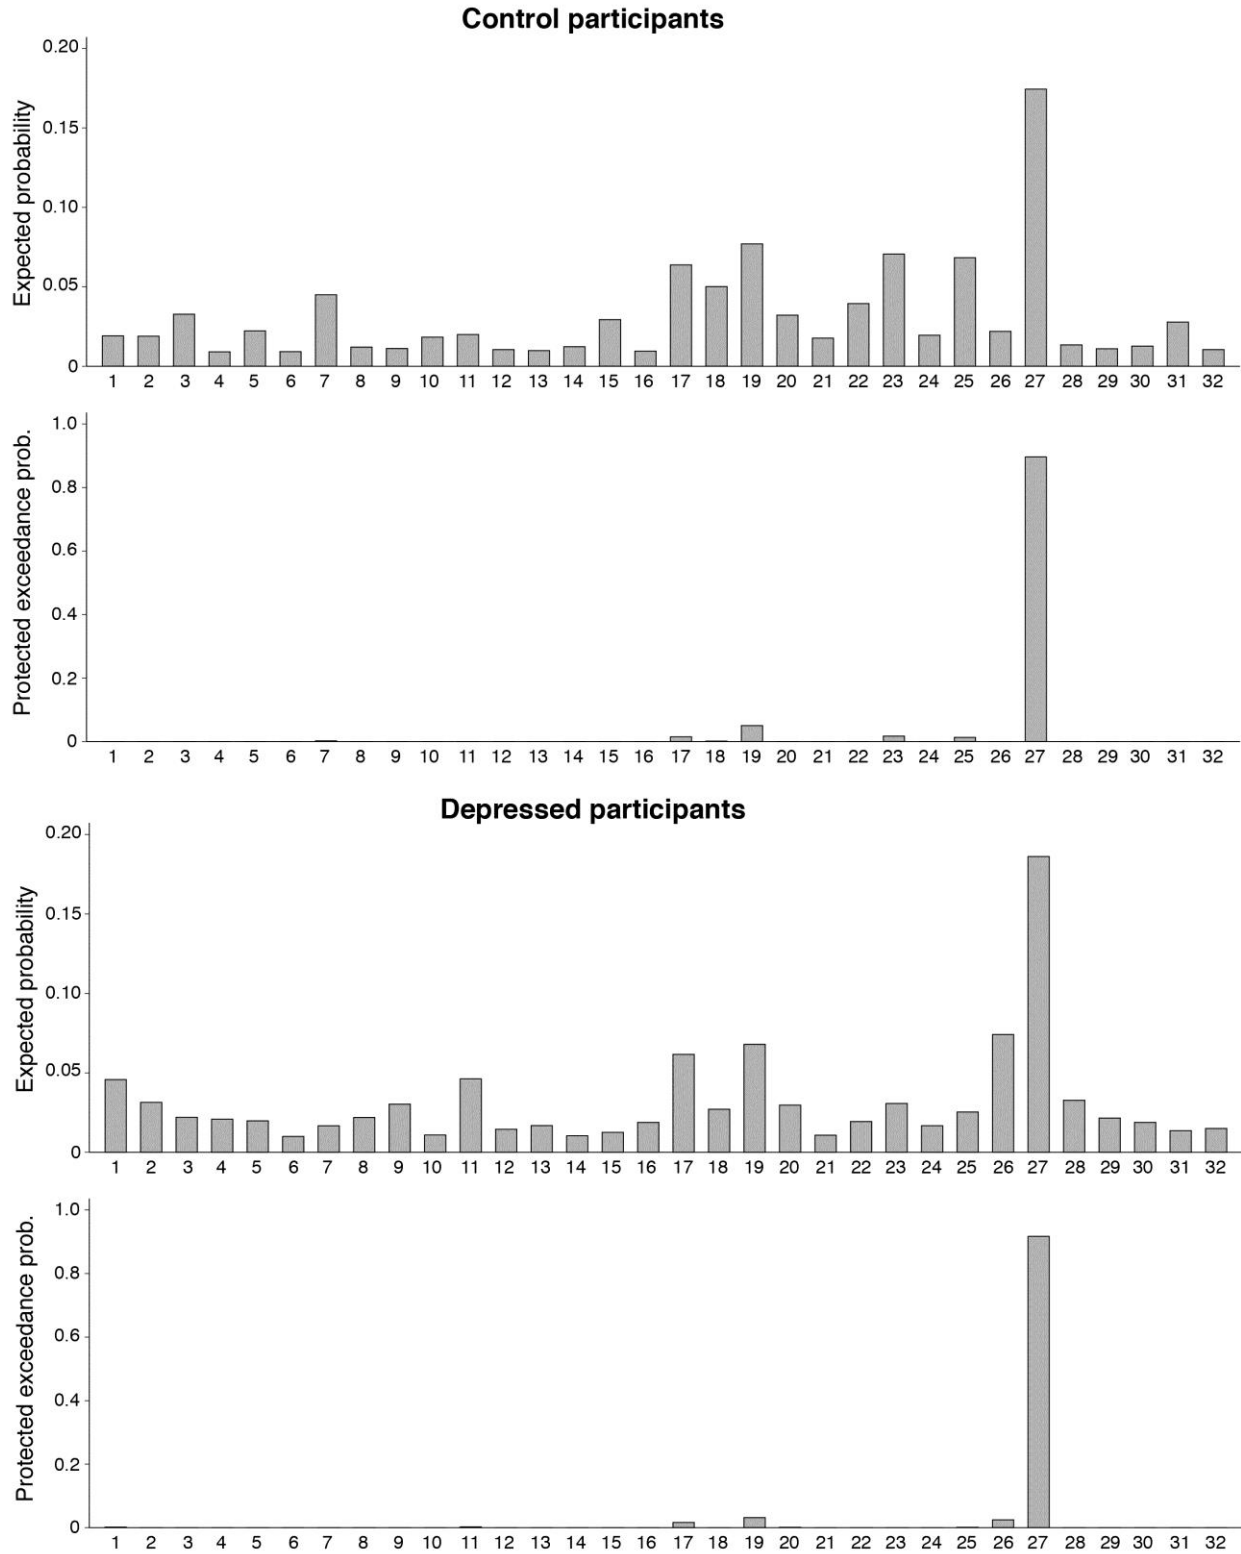

**FIGURE S2.** Bayesian model selection. BMS clearly favored model 27 in both the control participants (expected probability = 0.17, protected exceedance probability = 0.90) and the depressed participants (expected probability = 0.19, protected exceedance probability = 0.92).
